# Supplementary material
Source: PubMed Central journal article supplement (PMC4076017)
Supplement: cb500038g_si_001.pdf [file cb500038g_si_001.pdf]

Supporting Information for:

Identification and Characterization of an Allosteric Inhibitory Site on Dihydropteroate  
Synthase

*Dalia I. Hammoudeh<sup>†</sup>, Mihir Daté<sup>†#</sup>, Mi-Kyung Yun<sup>†</sup>, Weixing Zhang<sup>†</sup>, Vincent A. Boyd<sup>#</sup>,  
Ariele Viacava Follis<sup>†</sup>, Elizabeth Griffith<sup>‡</sup>, Richard, E. Lee<sup>‡</sup>, Donald Bashford<sup>†\*</sup>, and  
Stephen W. White<sup>†§\*</sup>*

Departments of <sup>†</sup>Structural Biology and <sup>‡</sup>Chemical Biology and Therapeutics, St. Jude  
Children's Research Hospital, Memphis, TN, 38105

<sup>§</sup>Department of Microbiology, Immunology and Biochemistry, University of Tennessee  
Health Science Center, Memphis, TN, 38163

<sup>#</sup>Current address: Infection - iMED, AstraZeneca, Waltham, Ma, 02452

\*Corresponding Authors:

## TABLE OF CONTENTS

|                 |                                                                                                                                                            |
|-----------------|------------------------------------------------------------------------------------------------------------------------------------------------------------|
| Methods         | 2D and 3D NMR Spectroscopy experiments, computational simulations and quasi-harmonic mode analysis, and Surface Plasmon Resonance (SPR) experiments.       |
| Table S1.       | X-ray crystallography data collection statistics.                                                                                                          |
| Table S2.       | X-ray crystallography refinement statistics.                                                                                                               |
| Table S3.       | NMR assigned resonances on BaDHPS.                                                                                                                         |
| Figure S1.      | Michaelis- Menten kinetics of BaDHPS, YpDHPS and SaDHPS in the presence of compound <b>11</b> .                                                            |
| Figure S2.      | A comparison of the 2Fo–Fc and Simulated Annealing Omit maps between the compound <b>11</b> binding site and the equivalent site in BaDHPS structure 4D9P. |
| Figure S3.      | BaDHPS NMR assignments.                                                                                                                                    |
| Figure S4.      | RMSF from eigenvectors: RMSF from first six dominant quasi-harmonic modes.                                                                                 |
| Figure S5.      | Relative rotation of the monomers within the YpDHPS dimer upon enzyme catalysis.                                                                           |
| Figure S6.      | Subtle loop7 movements relative to loop2 in YpDHPS upon catalysis.                                                                                         |
| Movies S1 - S4. | Animation movies of the most dominant Quasi-harmonic mode from simulation E (Movie S1), IE (Movie S2), ES (Movie S3) and IES (Movie S4).                   |
| References      |                                                                                                                                                            |

## Methods

**NMR Spectroscopy - 2D and 3D Experiments.** All 2D and 3D NMR experiments were collected at 298K on a Bruker 800 MHz spectrometer equipped with a  $^1\text{H}$  and  $^{13}\text{C}$  detect, TCI triple-resonance, cryogenic single-axis gradient probe using standard Bruker pulse programs. Two-dimensional  $^1\text{H}$ - $^{15}\text{N}$  HSQC-TROSY spectra were recorded on 0.34 mM  $^1\text{H}$ ,  $^{15}\text{N}$ -labeled perdeuterated BaDHPS in 25 mM sodium phosphate, pH 7.0, 5 mM deuterated DTT (Cambridge) and 10%  $\text{D}_2\text{O}$ . To monitor the effects of added substrates,  $^1\text{H}$ - $^{15}\text{N}$  HSQC-TROSY spectra were recorded as described above, first with increasing concentrations of PtPP and then with increasing concentrations of pABA to achieve a final 1:1.1:1.1 (BaDHPS:PtPP:pABA) ternary complex. Finally,  $^1\text{H}$ - $^{15}\text{N}$  HSQC-TROSY spectra were collected from this ternary complex in the presence of 1 mM **11**. For all 2D experiments, 32 scans, 2048 $\times$ 200 complex points, and spectral windows of 14 ppm  $\times$  45 ppm in the  $^1\text{H}$  and  $^{15}\text{N}$  dimensions, respectively, were collected. All spectra were processed with TopSpin (Bruker Biospin) and analyzed with CARA.<sup>1</sup> Backbone resonances were assigned using the standard triple-resonance experiments HNCA and HN(CO)CA on a 0.7 mM  $^1\text{H}$ ,  $^{15}\text{N}$ ,  $^{13}\text{C}$ -labeled BaDHPS sample. For HNCA experiments, 64 scans, 2048 $\times$ 80 $\times$ 40 complex points, and spectral windows of 14, 27, and 30 ppm in the  $^1\text{H}$ ,  $^{13}\text{C}$  and  $^{15}\text{N}$  dimensions, respectively, were acquired. For HN(CO)CA, data collection parameters were, 48 scans, 2048 $\times$ 40 $\times$ 80 complex points, and spectral windows of 14, 45, and 27 ppm in the  $^1\text{H}$ ,  $^{13}\text{C}$  and  $^{15}\text{N}$  dimensions, respectively.

**Computational Methods.** The starting structure for the inhibitor-bound enzyme (IE) was based on the crystallographic structure of the complex with compound **11**. The

strategy for choosing initial coordinates for the unresolved loops 1 and 2 was to model them from the YpDHPS intermediate structure, PDB code 3TYZ,<sup>2</sup> so as to place them in the most functionally relevant conformation while maintaining the BaDHPS sequence. For the starting models of the enzyme-substrate (ES) and inhibitor-enzyme-substrate (IES) complexes, the substrates pABA and DHPP and Mg<sup>2+</sup> were placed inside the active site of each monomer using previously published PDB structures: 3TYZ for pABA and 3TZF for DHPP and Mg<sup>2+</sup>. The *apo*-enzyme structure (E) was generated simply by removing the inhibitor from the IE structure. His256 which coordinates the  $\beta$ -phosphate, was considered to be protonated.<sup>2</sup>

The starting structures were placed at the center of a periodically repeating box filled with TIP3P water molecules,<sup>3</sup> and a neutralizing number of Na<sup>+</sup> counter-ions. The simulation cell size was chosen such that the distance between the sides of the box and the surface of the solute was at least 12 Å. The system was heated from 0K to 300K in six steps of 50K per 50 ps each followed by equilibration at 300K, using the Langevin method, for 400 ps at a constant pressure of 1 atm maintained using isotropic position scaling. In order to remain close to the starting crystal structure during heating and equilibration, weak (0.5 kcal mol<sup>-1</sup> Å<sup>-2</sup>) center of mass harmonic restraints were applied to all backbone atoms of the protein and carbon atoms of the substrates or compound **11**. With no restraints, another constant pressure equilibration was performed for 400 ps before final constant volume equilibration of 400 ps. Production simulations were run for of 16 ns at constant volume and temperature. A time step of 2 fs was used and the SHAKE algorithm was applied to constrain bonds involving hydrogen atoms. Electrostatic interactions were treated with the particle mesh Ewald method<sup>4</sup> with a

direct-space sum limit of 10 Å. The ff99SB force field<sup>5</sup> was used for protein residues and ions. Previously published sets of partial charges<sup>2</sup> were chosen for substrate atoms while other parameters were generated using Antechamber for substrate molecules.

Normal Mode Analysis (NMA) or quasi-harmonic analysis of the trajectories was performed using the cpptraj program<sup>6</sup> within Amber12.<sup>7</sup> Briefly, the method of NMA is based on the diagonalization of the covariance matrix of atomic displacements observed in the ensemble, which yields a set of eigenvectors and eigenvalues. The eigenvectors represent the directions in 3N dimensional space (where N is number of atoms) describing correlated displacements of atoms. The eigenvalues represent the mean square fluctuation of the total displacement along the corresponding eigenvector. For the analysis of correlations between residues, only  $\alpha$ -carbon coordinates were analyzed because more meaningful statistics can be obtained by restricting the number of atoms included in the analysis. Correspondences between quasi-harmonic modes of two different simulations were established by a dot-product test. For animations, all atoms were used.

**Surface Plasmon Resonance (SPR) Experiments.** Experiments were conducted at 20° C using a Biacore T200 optical biosensor (GE Healthcare). Poly-His tagged BaDHPS was immobilized on polycarboxylate hydrogel-coated gold chips preimmobilized with nitrilotriacetic acid (NiHC200m chips; Xantec Bioanalytics) by capture-coupling, a hybrid method of capture and amine coupling chemistry.<sup>8</sup> The chip was primed in chelating buffer (10 mM HEPES pH 7.4, 150 mM NaCl, 50  $\mu$ M EDTA, 0.005% Tween20) and was preconditioned at 10  $\mu$ L/min with three 60s injections of wash buffer (10 mM HEPES pH 8.3, 150 mM NaCl, 350 mM EDTA, 0.05% Tween20)

and one 60 s injection of chelating buffer before being charged with a 60 s injection of 500  $\mu\text{M}$   $\text{NiCl}_2$  in chelating buffer. After priming into immobilization buffer (20 mM HEPES pH 7.6, 150 mM NaCl, 1 mM TCEP, 0.005% Tween20, 5% glycerol), carboxyl groups on the hydrogel were activated with *N*-ethyl-*N'*-(3-dimethylaminopropyl) carbodiimide (EDC) and *N*-hydroxysuccinimide (NHS), and DHPS was injected until immobilization of  $\sim 3100$  RU was achieved. Any remaining active sites were blocked by Tris molecules in the binding analysis buffer (20 mM Tris pH 7.6, 150 mM NaCl, 1 mM TCEP, 0.01% Tween20, 5% glycerol, 5% DMSO). One flow cell on the chip was charged with  $\text{Ni}^{2+}$  and activated with EDC/NHS without adding protein to be used as a reference cell.

Compound **1** was prepared in binding analysis buffer as a 3-fold dilution series starting at 200  $\mu\text{M}$  and was injected at a flow rate of 100  $\mu\text{L}/\text{min}$ . A series of buffer-only (blank) injections was included throughout the experiment to account for instrumental noise. The data were processed, double-referenced, solvent corrected<sup>9</sup> and analyzed using the software package Scrubber2 (version 2.0c, BioLogic Software). The equilibrium dissociation constant ( $K_D$ ) was determined by fitting the data to a 1:1 interaction model.

**Table S1. X-ray crystallography data collection statistics**

| <b>Parameter</b>                  | <b>Compound 4</b>   | <b>Compound 5</b>     | <b>Compound 6</b>     | <b>Compound 11</b>  |
|-----------------------------------|---------------------|-----------------------|-----------------------|---------------------|
| Space group                       | P6 <sub>2</sub> 22  | P6 <sub>2</sub> 22    | P6 <sub>2</sub> 22    | P6 <sub>2</sub> 22  |
| Cell dimensions (Å)               | 98.5, 98.5, 262     | 99.7, 99.7, 263.2     | 98.3,98.3,263.4       | 98.8, 98.8, 263.3   |
| Resolution range (Å) <sup>a</sup> | 50.0-2.0 (2.07-2.0) | 50.0-2.18 (2.26-2.18) | 50.0-1.77 (1.83-1.77) | 30.0-2.3 (2.38-2.3) |
| R <sub>sym</sub> <sup>a,b</sup>   | 0.078(0.35)         | 0.074 (0.414)         | 0.089 (0.597)         | 0.174 (0.356)       |
| I/σ <sup>a</sup>                  | 27.9(4.4)           | 50.0(3.1)             | 25.9(2.2)             | 8.0(3.0)            |
| Completeness (%) <sup>a</sup>     | 90.5(48.1)          | 86.3(65.5)            | 94.8(71.6)            | 90.5(54.0)          |
| Redundancy <sup>a</sup>           | 11.5(6.7)           | 11.0(6.3)             | 11.2(6.2)             | 11.1(7.4)           |
| Unique reflections                | 47,488              | 35,835                | 70,993                | 31,293              |

<sup>a</sup> Values in parentheses refer to the highest resolution shell.

<sup>b</sup>  $R_{\text{sym}} = \Sigma |(I - \langle I \rangle)| / \Sigma(I)$ , where  $I$  is the observed intensity.

**Table S2. X-ray crystallography refinement statistics**

| <b>Parameter</b>               | <b>Compound 4</b> | <b>Compound 5</b> | <b>Compound 6</b> | <b>Compound 11</b> |
|--------------------------------|-------------------|-------------------|-------------------|--------------------|
| Resolution range (Å)           | 32.68 - 1.99      | 49.92 - 2.18      | 32.19 - 1.77      | 29.94 - 2.30       |
| No. of reflections             | 47,064            | 35,313            | 70,904            | 29407              |
| No. in test set (5%)           | 2397              | 1772              | 3575              | 1565               |
| R <sub>work</sub>              | 0.219             | 0.226             | 0.192             | 0.207              |
| R <sub>free</sub> <sup>a</sup> | 0.250             | 0.280             | 0.220             | 0.253              |
| Rmsd from ideal values         |                   |                   |                   |                    |
| Bond lengths (Å)               | 0.007             | 0.007             | 0.006             | 0.011              |
| Bond angles (°)                | 1.050             | 1.065             | 1.062             | 1.448              |
| Ramachandran plot              |                   |                   |                   |                    |
| Favored (%)                    | 98.32             | 97.93             | 98.69             | 96.93              |
| Allowed (%)                    | 1.31              | 1.69              | 1.12              | 2.69               |
| Outliers (%)                   | 0.37              | 0.38              | 0.19              | 0.38               |
| PDB code                       | <b>4NHV</b>       | <b>4NIL</b>       | <b>4NIR</b>       | <b>4NL1</b>        |

<sup>a</sup>R<sub>free</sub> is the R value obtained for a test set of reflections consisting of randomly selected 5% subset of the data set excluded from refinement.



**Table S3. NMR  $^1\text{H}$  and  $^{15}\text{N}$  assigned chemical shifts on BaDHPS**

| <b>Residue</b> | <b><math>^1\text{H}</math> (ppm)</b> | <b><math>^{15}\text{N}</math> (ppm)</b> | <b>Residue</b> | <b><math>^1\text{H}</math> (ppm)</b> | <b><math>^{15}\text{N}</math> (ppm)</b> |
|----------------|--------------------------------------|-----------------------------------------|----------------|--------------------------------------|-----------------------------------------|
| Ser -18        | 7.53                                 | 117.369                                 | Gly 64         | 8.327                                | 110.528                                 |
| Ser -17        | 8.409                                | 118.897                                 | Glu 65         | 8.402                                | 121.088                                 |
| His -16        | 7.809                                | 123.745                                 | Ser 66         | 7.959                                | 118.232                                 |
| His -14        | 9.117                                | 127.265                                 | Thr 67         | 8.468                                | 118.963                                 |
| His -13        | 8.749                                | 127.464                                 | Arg 68         | 8.177                                | 118.722                                 |
| His -12        | 8.129                                | 118.365                                 | Gly 70         | 7.816                                | 114.713                                 |
| His -11        | 8.136                                | 121.022                                 | Phe 71         | 8.027                                | 120.158                                 |
| Ser -10        | 8.096                                | 120.884                                 | Ala 72         | 7.734                                | 124.874                                 |
| Ser -9         | 7.614                                | 119.067                                 | Lys 73         | 8.572                                | 121.354                                 |
| Gly -8         | 8.329                                | 109.668                                 | Val 74         | 7.278                                | 123.014                                 |
| Leu -7         | 8.415                                | 122.018                                 | Ser 75         | 7.877                                | 111.458                                 |
| Val -6         | 8.061                                | 122.616                                 | Val 76         | 8.715                                | 113.052                                 |
| Arg -4         | 8.054                                | 119.295                                 | Glu 77         | 8.558                                | 128.792                                 |
| Gly -3         | 8.388                                | 111.259                                 | Glu 78         | 9.403                                | 125.339                                 |
| Ser -2         | 6.931                                | 118.299                                 | Glu 79         | 9.008                                | 126.401                                 |
| His -1         | 8.865                                | 128.062                                 | Ile 80         | 8.263                                | 117.037                                 |
| Met 1          | 8.013                                | 122.151                                 | Lys 81         | 8.429                                | 122.274                                 |
| Lys 2          | 9.382                                | 127.132                                 | Arg 82         | 8.063                                | 128.859                                 |
| Trp 3          | 7.932                                | 122.35                                  | Trp 123        | 8.102                                | 124.622                                 |
| Asp 31         | 8.395                                | 124.276                                 | Gly 124        | 7.863                                | 113.185                                 |
| Ser 32         | 8.354                                | 120.026                                 | Ala 125        | 8.552                                | 123.294                                 |
| Phe 33         | 8.477                                | 120.756                                 | Lys 126        | 7.83                                 | 127.862                                 |
| Ser 34         | 8.531                                | 118.432                                 | Ala 127        | 7.83                                 | 121.952                                 |
| Asp 35         | 7.905                                | 123.878                                 | Asn 147        | 7.755                                | 118.697                                 |
| Gly 36         | 8.231                                | 109.731                                 | Arg 148        | 9.362                                | 122.682                                 |
| Gly 37         | 8.129                                | 109.134                                 | Asp 149        | 7.04                                 | 130.121                                 |
| Ser 38         | 7.83                                 | 119.361                                 | Asn 150        | 8.885                                | 114.845                                 |
| Tyr 39         | 7.251                                | 121.952                                 | Gly 186        | 7.802                                | 114.513                                 |
| Asn 40         | 7.183                                | 110.661                                 | Ile 187        | 7.618                                | 123.811                                 |
| Glu 41         | 8.313                                | 122.151                                 | Gly 188        | 7.802                                | 103.754                                 |
| Asp 43         | 7.884                                | 122.483                                 | Phe 189        | 8.32                                 | 119.229                                 |
| Ala 44         | 7.012                                | 121.487                                 | Ala 190        | 8.238                                | 123.944                                 |
| Ala 45         | 8.143                                | 119.229                                 | Lys 266        | 7.973                                | 119.229                                 |
| Val 46         | 8.449                                | 125.14                                  | Met 267        | 8.265                                | 116.838                                 |
| Arg 47         | 8.245                                | 125.206                                 | Met 268        | 7.945                                | 119.959                                 |
| His 48         | 8.626                                | 112.322                                 | Asp 269        | 8.177                                | 121.088                                 |
| Ala 49         | 8.429                                | 117.103                                 | Ala 270        | 8.197                                | 123.147                                 |
| Glu 55         | 8.667                                | 117.967                                 | Met 271        | 7.911                                | 122.35                                  |
| Gly 56         | 7.108                                | 103.953                                 | Ile 272        | 115.31                               | 115.31                                  |
| Ala 57         | 7.916                                | 123.474                                 | Gly 273        | 115.853                              | 115.853                                 |
| His 58         | 6.972                                | 117.927                                 | Lys 274        | 115.775                              | 115.775                                 |
| Ile 59         | 8.279                                | 122.948                                 | Gly 275        | 112.786                              | 112.786                                 |
| Asp 61         | 7.921                                | 116.771                                 | Val 276        | 118.697                              | 118.697                                 |
| Ile 62         | 8.388                                | 123.274                                 | Lys 277        | 130.32                               | 130.32                                  |
| Gly 63         | 8.531                                | 112.454                                 |                |                                      |                                         |

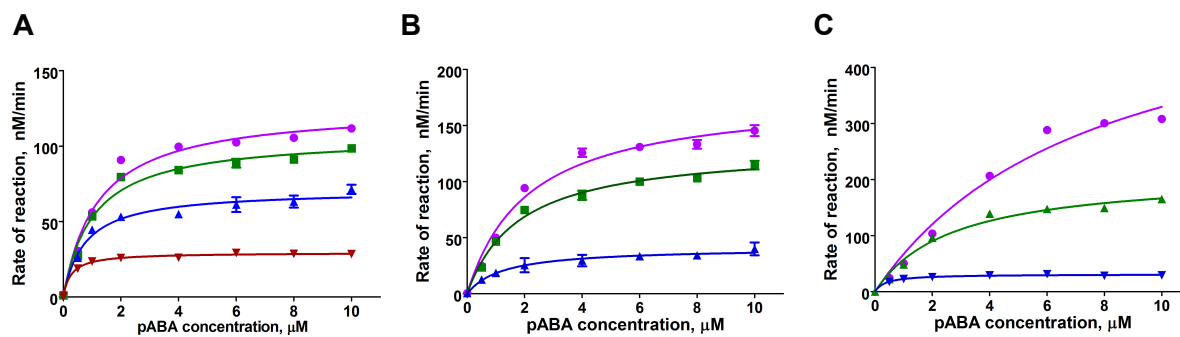

**Figure S1.** Michaelis-Menten kinetics. Initial rates of 5 nM (A) BaDHPS, (B) YpDHPS, and (C) SaDHPS catalysis were measured at increasing concentrations of pABA (0, 0.5, 1, 2, 4, 6, 8, 10  $\mu\text{M}$ ), a fixed DHPP concentration of 20  $\mu\text{M}$  at increasing concentrations of **11**: 0  $\mu\text{M}$  (magenta curves), 50  $\mu\text{M}$  (green), 100  $\mu\text{M}$  (blue) and 200  $\mu\text{M}$  (red – only measured for the BaDHPS enzyme (A)). Refer to Table 1 for the kinetic parameters  $K_m$  and  $V_{max}$ . Data were analyzed by using GraphPad Prism software.

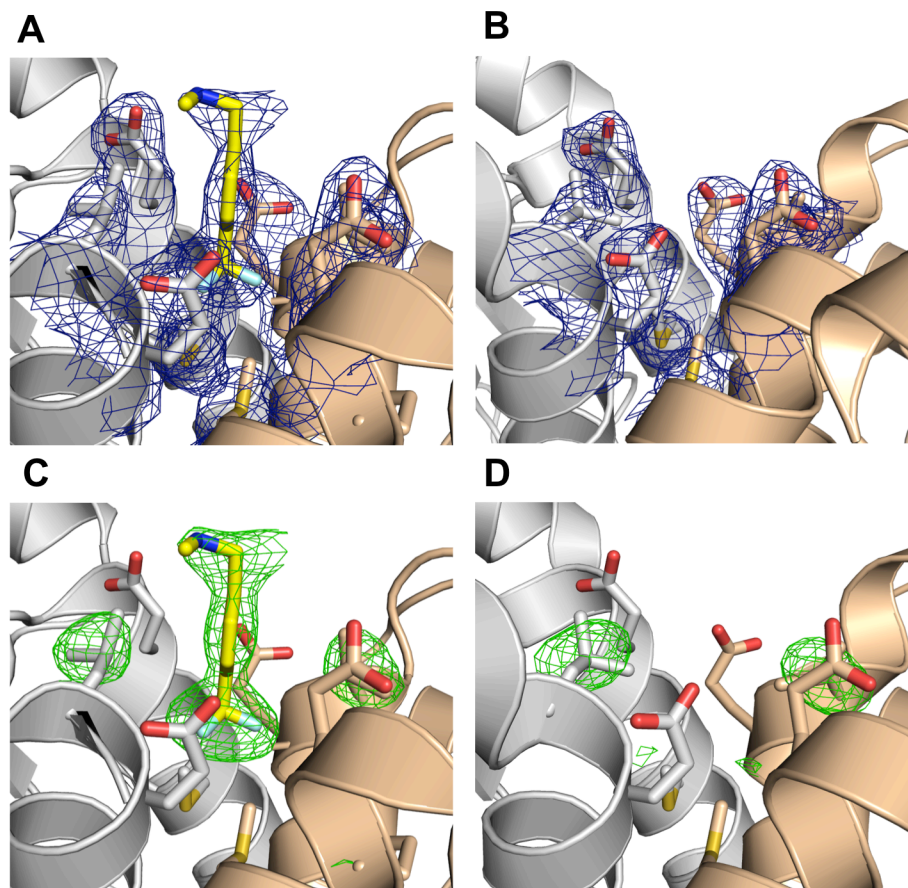

**Figure S2.** Clear electron density at the twofold symmetry axis is only present in DHPS crystals soaked with dimer interface inhibitors. (A) The 2Fo-Fc density map (blue mesh) at the dimer interface showing compound **11** and neighboring residues. (B) The identical map shown in (A) for a previously published structure (pdb code 4D9P) containing a pterin pocket inhibitor<sup>10</sup>. (C) Simulated annealing (SA) omit map (green mesh) of the compound **11** structure in which the compound is omitted together with the side chain of Leu235 as an internal reference. (D) The identical map shown in (C) for the structure shown in (B). The 2Fo-Fc maps are contoured at 1  $\sigma$  and the SA omit maps are contoured at 3  $\sigma$ .

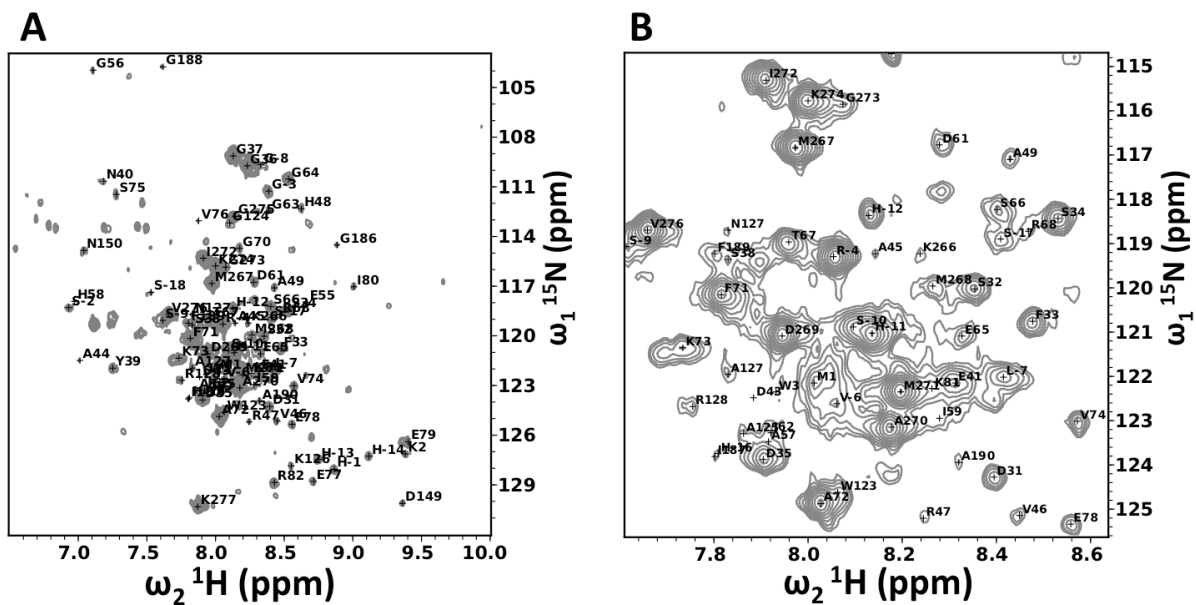

**Figure S3.** BaDHPS NMR assignments. (A)  $^1\text{H}$ - $^{15}\text{N}$ -TROSY-HSQC spectrum of BaDHPS with assigned resonances labeled. (B) Close-up of overlapped region in (A). See Supplementary Table S3 for the  $^1\text{H}$  and  $^{15}\text{N}$  chemical shifts.

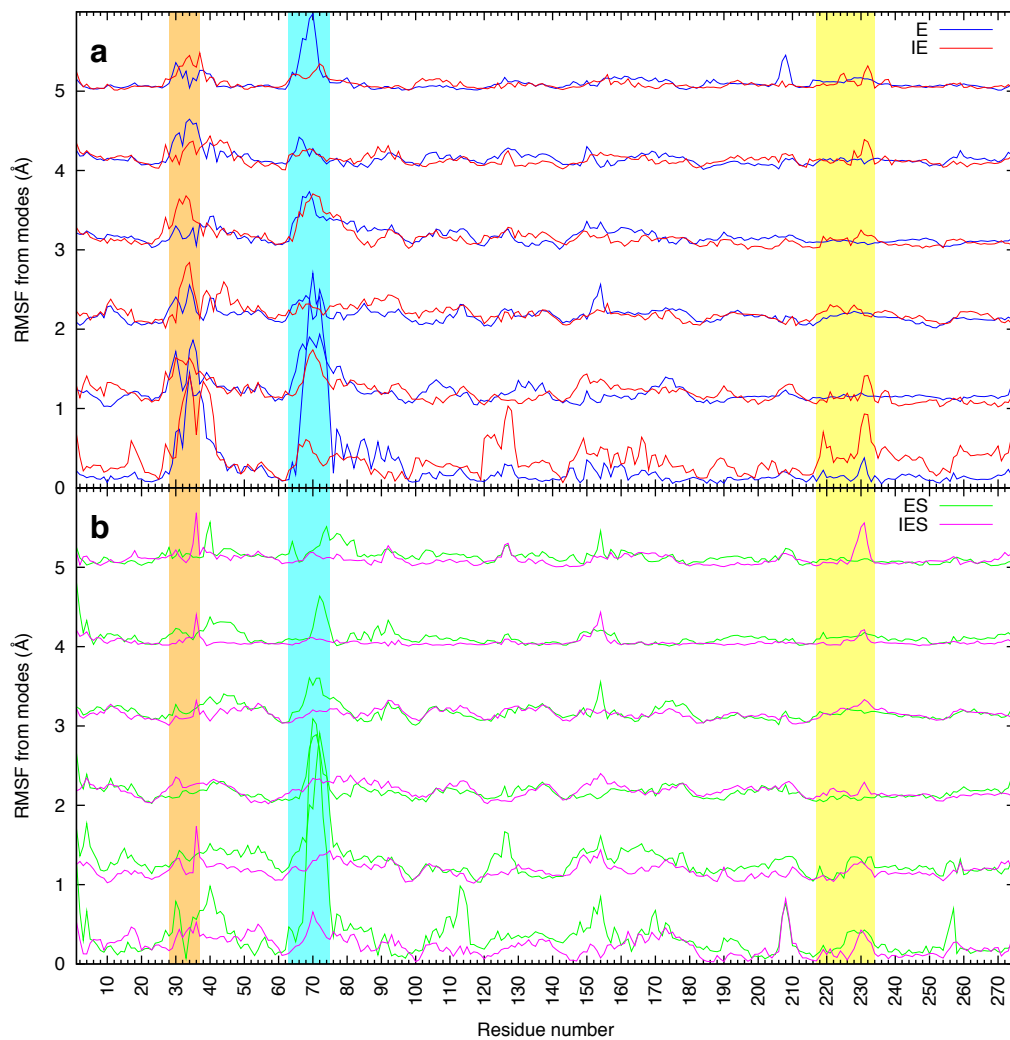

**Figure S4.** RMSF from eigenvectors: RMSF from first six dominant quasi-harmonic modes. Compared quasi-harmonic modes from different simulations are matched by the dot-product method. Plots for each successive mode are offset by 1.0 Å for clarity. Highlighting of loop regions and plot line colors are as in Figure 6. (A) The simulations without substrates (E and IE). (B) The simulations with substrates (ES and IES).

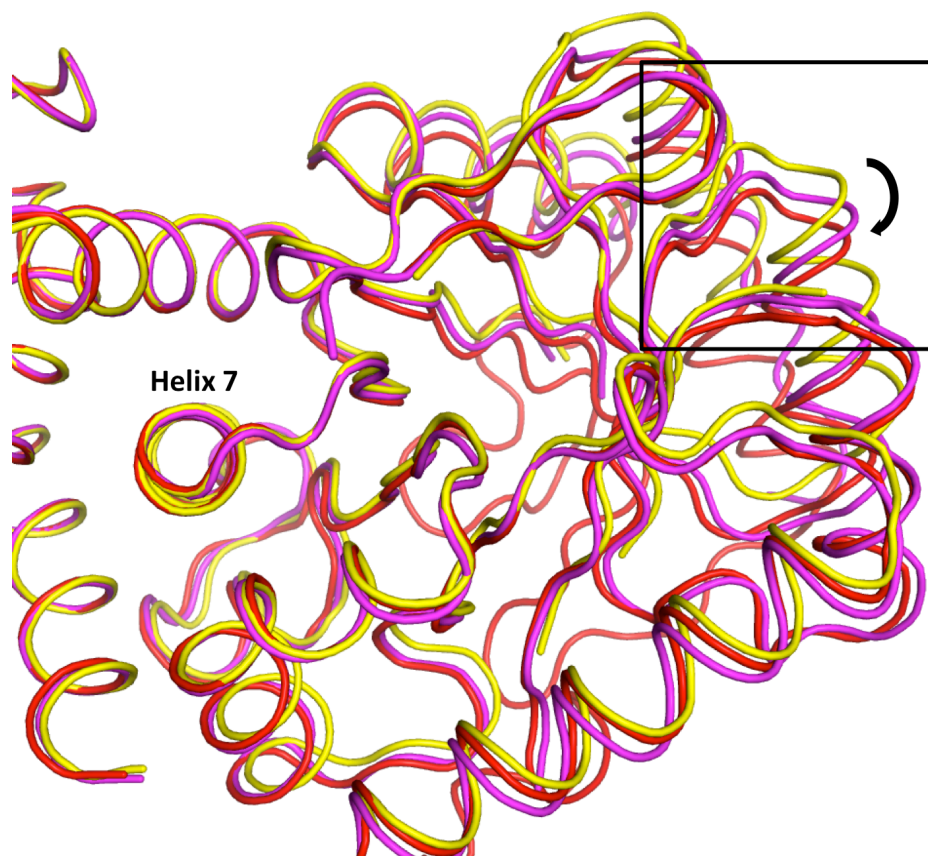

**Figure S5.** Relative rotation of the monomers within the YpDHPS dimer upon enzyme catalysis. (Yellow) apo YpDHPS structure (pdb ID: 3TZN), (red) intermediate-state YpDHPS structure (pdb ID: 3TYZ), (magenta) product analog bound YpDHPS structure (pdb ID: 3TYU). In this figure, one monomer in the dimer was fully superimposed to emphasize the relative motion of the second monomer. The rotation (around the axis of helix  $\alpha 7$  at the dimer interface) is most obvious within the box and indicated by the arrow.

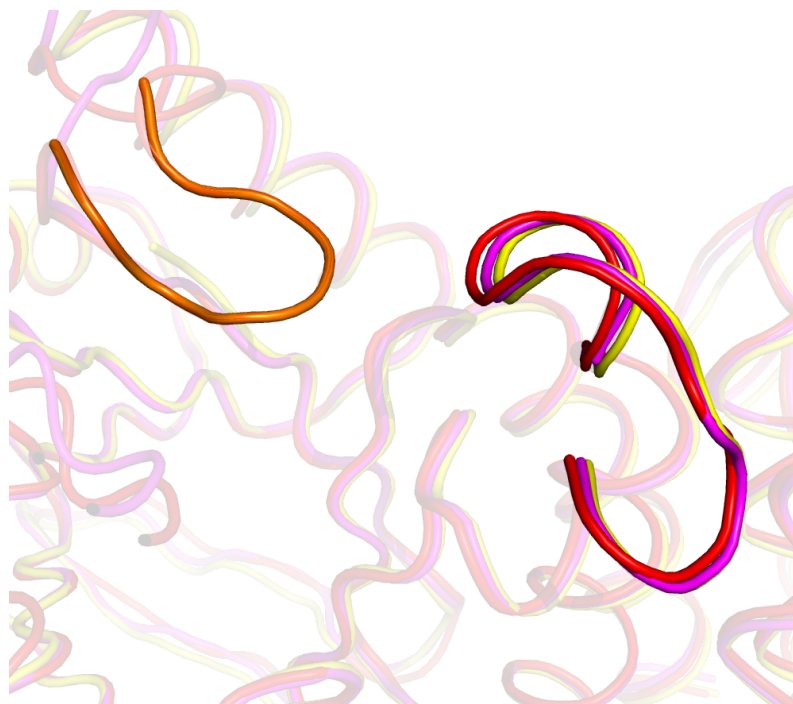

**Figure S6.** Subtle loop7 movements relative to loop1 in YpDHPS upon catalysis. (Yellow) apo YpDHPS structure (pdb ID: 3TZN), (red) intermediate-state YpDHPS structure (pdb ID: 3TYZ), (magenta) product analog bound YpDHPS structure (pdb ID: 3TYU). In this figure, the cores of one monomer from all three structures were aligned to show the loop7 motion in relation to the body of the protein. The loop1 (orange) structure is taken from the intermediate-state structure.

**Movies.** Animation movies of the most dominant Quasi-harmonic mode from simulation E (Movie S1), IE (Movie S2), ES (Movie S3) and IES (Movie S4). Movies were made using Chimera<sup>11</sup> and the PCAsuite<sup>12</sup> animation utility to which Amber12 trajectory was fed as input. For each movie, loop1 and loop2 are in orange ribbon and loop7 and helix7 are in blue ribbon representation. Only select enzyme residues, compound **11** and substrates are shown in stick, while Mg<sup>2+</sup> ions are in ball representation. Carbon atoms are colored tan (enzyme), light green (compound **11**), and dark green (substrates). Mg<sup>2+</sup> cations and fluorine atoms of **11** are colored in magenta. Movies S1 (simulation E) and S3 (simulation ES), show a breathing motion where monomers move away from each other and come closer again. In Movies S2 (simulation IE) and S4 (simulation IES), this breathing motion is frozen.

**Movie S1.** Animation movie of the most dominant Quasi-harmonic mode from simulation of apo DHPS (E).

**Movie S2.** Animation movie of the most dominant Quasi-harmonic mode from simulation of DHPS:**11** (IE).

**Movie S3.** Animation movie of the most dominant Quasi-harmonic mode from simulation of DHPS:Substrates (ES).

**Movie S4.** Animation movie of the most dominant Quasi-harmonic mode from simulation of DHPS:**11**:Substrates (IES).

1. Keller, R. L. J. (2005) Optimizing the Process of Nuclear Magnetic Resonance Spectrum Analysis and Computer Aided Resonance Assignment. In *Molecular Biology and Biophysics*, Institute of Molecular Biology and Biophysics at ETH Zurich.
2. Yun, M.-K., Wu, Y., Li, Z., Zhao, Y., Waddell, M. B., Ferreira, A. M., Lee, R. E., Bashford, D., and White, S. W. (2012) Catalysis and Sulfa Drug Resistance in Dihydropteroyl Synthase. *Science* 335, 1110–1114.



3. Jorgensen, W. L., Chandrasekhar, J., Madura, J. D., Impey, R. W., and Klein, M. L. (1983) Comparison of simple potential functions for simulating liquid water. *J Chem Phys* 79, 926–935.
4. Cheatham, T. E., III, Miller, J. L., Fox, T., Darden, T. A., and Kollman, P. A. (1995) Molecular Dynamics Simulations on Solvated Biomolecular Systems: The Particle Mesh Ewald Method Leads to Stable Trajectories of DNA, RNA, and Proteins. *J Am Chem Soc* 117, 4193–4194.
5. Hornak, V., Abel, R., Okur, A., Strockbine, B., Roitberg, A., and Simmerling, C. (2006) Comparison of multiple Amber force fields and development of improved protein backbone parameters. *Proteins* 65, 712–725.
6. Roe, D. R., and Cheatham III., T. E. (2013) PTRAJ and CPPTRAJ: Software for Processing and Analysis of Molecular Dynamics Trajectory Data. *J Chem Theory Comput* 9, 3084-3095.
7. D.A. Case, T. A. D., T.E. Cheatham, III, C.L. Simmerling, J. Wang, R.E. Duke, R. Luo, R.C. Walker, W. Zhang, K.M. Merz, B. Roberts, S. Hayik, A. Roitberg, G. Seabra, J. Swails, A.W. Goetz, I. Kolossváry, K.F. Wong, F. Paesani, J. Vanicek, R.M. Wolf, J. Liu, X. Wu, S.R. Brozell, T. Steinbrecher, H. Gohlke, Q. Cai, X. Ye, J. Wang, M.-J. Hsieh, G. Cui, D.R. Roe, D.H. Mathews, M.G. Seetin, R. Salomon-Ferrer, C. Sagui, V. Babin, T. Luchko, S. Gusarov, A. Kovalenko, and P.A. Kollman. (2012) AMBER 12, University of California, San Francisco.
8. Rich, R. L., Errey, J., Marshall, F., and Myszka, D. G. (2011) Biacore analysis with stabilized G-protein-coupled receptors. *Anal Biochem* 409, 267–272.
9. Myszka, D. G. (1999) Improving biosensor analysis, *J Mol Recognit* 12, 279–284.
10. Zhao, Y., Hammoudeh, D., Yun, M. K., Qi, J., White, S. W., and Lee, R. E. (2012) Structure-based design of novel pyrimido[4,5-c]pyridazine derivatives as dihydropteroate synthase inhibitors with increased affinity. *ChemMedChem* 7, 861–870.
11. Pettersen, E.F., Goddard, T.D., Huang, C.C., Couch, G.S., Greenblatt, D.M., Meng, E.C., and Ferrin, T.E. (2004) UCSF chimera - A visualization system for exploratory research and analysis. *J Comput Chem* 25, 1605–1612.
12. Meyer, T., Ferrer-Costa, C., Perez, A., Rueda, M., Bidon-Chanal, A., Luque, F.J., Laughton, C.A., and Orozco, M. (2006) Essential dynamics: A tool for efficient trajectory compression and management. *J Chem Theory Comput* 2, 251–258.
